# Supplementary material for: Novel epoxide-promoted polymerization of lactides mediated by a zinc guanidine complex: a potential strategy for the tin-free PLA industry
Source: Royal Society of Chemistry journal article supplement (doi:10.1039/d3py00890h), 2023-01-01
Supplement: d3py00890h1.pdf [file d3py00890h1.pdf]

## Supporting Information

### **Novel Epoxide-Promoted Polymerization of Lactide Mediated by Zinc Guanidine Complex: Potential Strategy for Tin-Free PLA Industry**

Hongyi Suo,<sup>a, b</sup> Shuang Liu,<sup>a</sup> Jiaoyu Liu,<sup>a</sup> Zisheng Zhang,<sup>a</sup> Rui Qu,<sup>a, b</sup> Yanan Gu <sup>a, b</sup> and Yusheng Qin <sup>\*a, b</sup>

<sup>a</sup> College of Chemistry and Chemical Engineering, Yantai University, 264005 Yantai, PR China.

<sup>b</sup> Institute of Materials, Yantai University, Yantai 264005, Shandong, China.

E-mail: [ysqin@ytu.edu.cn](mailto:ysqin@ytu.edu.cn)

## Table of Contents

|                                              |    |
|----------------------------------------------|----|
| 1. Experimental Procedures .....             | 3  |
| 1.1 General Information.....                 | 3  |
| 1.2 Procedural Information .....             | 3  |
| 2. Supplementary Figures and Tables .....    | 5  |
| 2.1 Characterization of Zinc Complex.....    | 5  |
| 2.2 NMR Characterization .....               | 6  |
| 2.3 Polymerization Results .....             | 9  |
| 2.4 GPC Traces for Polymer Degradation ..... | 10 |
| 2.5 Thermal Analysis .....                   | 10 |
| 2.6 Kinetic Study .....                      | 12 |
| 2.7 MALDI-TOF-MS Spectra .....               | 12 |
| 2.8 The Role of CHO .....                    | 13 |
| 2.9 ICP-OES Data.....                        | 14 |
| 3. References.....                           | 14 |

# 1. Experimental Procedures

## 1.1 General Information

### Chemicals

All manipulations were carried out with standard Schlenk techniques under argon protection. All solvents and reagents, unless otherwise specified, were purchased from commercial suppliers, and used without additional processing. Toluene and tetrahydrofuran were refluxed in sodium and distilled under argon. Racemic lactide (*rac*-LA) and L-lactide (*L*-LA) were recrystallized from toluene once prior to use. Cyclohexene oxide (CHO), 1,2-butene oxide (BO), propylene oxide (PO), epichlorohydrin (ECH), and glycidyl methacrylate (GMA) were refluxed over CaH<sub>2</sub> and distilled under argon.

### Characterizations

**NMR:** All <sup>1</sup>H NMR and <sup>13</sup>C NMR spectra were recorded on a JEOL-400YH spectrometer at a frequency of 400 MHz.

**GPC:** The molecular weight (*M<sub>n</sub>*) and polydispersity (Đ) of the polymer was determined by gel permeation chromatography (GPC) on a Waters 2414 binary system with a refractive index detector, calibrated with polystyrene standards. The column temperature was maintained at 40 °C during the test using THF as the eluent at a flow rate of 1.0 mL/min.

**MALDI-TOF-MS:** MALDI-TOF-MS were acquired in linear mode in a *m/z* range 1000-10000 using a Bruker microflex LRF-MALDI TOF MS with 2,5-dihydroxybenzoic acid (DHB) as matrix. Samples were dissolved in THF (2-5 mg/mL).

**DSC:** Differential Scanning Calorimetry (DSC) analysis was performed on NETZSCH DSC 200F3. The experiments were performed by heating the samples from -20 to 200 °C (heating and cooling scans were repeated, at least in triplicate, to ensure reproducibility). Also, the measurements were carried out at a heating rate of 10 °C/min, in nitrogen atmosphere. The degree of crystallinity (*X<sub>c</sub>*) is calculated firstly by obtaining the values for melting enthalpy ( $\Delta H_m$ ) and cold crystallization ( $\Delta H_c$ ) as determined and automatically calculated from the DSC thermogram. The reference enthalpy  $\Delta H_m^0$  at 100% crystallinity is given as:  $\Delta H_m^0 = 93$  J/g (PLA)<sup>1</sup>. *X<sub>c</sub>* is given by the following equation:

$$X_c = \frac{\Delta H_m - \Delta H_c}{\Delta H_m^0} \times 100$$

**ICP-OES:** ICP-OES (Inductively coupled plasma-optical emission spectrometry) was pretreated as follows and tested on an Agilent 5110: A polymer sample (134.5 mg) was digested with acid and made up to 25 mL. These 25 mL solutions were subsequently analyzed for Zn content using ICP-OES. Calibration curve was built from 0.5, 1.0, 2.0, 5.0 and 10.0 mg/L. Samples were then measured and correlated relative to the calibration curve.

## 1.2 Procedural Information

### Complex synthesis

Guanidine-based ligand and zinc catalyst used were synthesized with reference to the relevant literature.<sup>2</sup> The acetonitrile (15 mL) solution of 2-chloro-1,3-dimethylimidazoline (2.53 g, 15 mmol) was added to the acetonitrile (15 mL) solution of 1, 2-cyclohexenediamine (0.85 g, 7.5 mmol) and triethylamine (2.08 mL) at 0 °C. The mixture was stirred by reflux in an oil bath at 83 °C for 12 h. After cooling to room temperature, NaOH (60 mmol) was added, and the solvent along with triethylamine were evaporated under vacuum. Then KOH (30 mL, 50 wt%) solution was added to deprotonate, extracted with acetonitrile (3×30 mL), the organic phase was dehydrated with anhydrous Na<sub>2</sub>SO<sub>4</sub>, and distilled under reduced pressure to obtain a yellow oil. Yield: 83%.

Zn(CF<sub>3</sub>SO<sub>3</sub>)<sub>2</sub> (0.1454 g, 0.4 mmol) and the ligand (0.3065 g, 1 mmol) were stirred in 4 mL and 6 mL of THF, respectively. In an oil bath at 55 °C, the ligand solution was added dropwise to the Zn(CF<sub>3</sub>SO<sub>3</sub>)<sub>2</sub> solution to obtain a white precipitate, which was then filtered, washed three times with THF and diethyl ether. Subsequently, the powder was dried in vacuum to obtain a white powdery solid. Yield: 96%.

Ligand: <sup>1</sup>H NMR (CDCl<sub>3</sub>, 400 MHz): δ = 3.22-3.19 (m, 2H), 3.14-3.11 (m, 8H), 2.85-2.84 (m, 4H), 2.65-2.63 (s, 12H), 1.68-1.64 (m, 2H), 1.59-1.57 (m, 2H), 1.37-1.29 (m, 2H), 1.21-1.16 (m, 2H) ppm. <sup>13</sup>C NMR (CDCl<sub>3</sub>, 101 MHz): δ = 157.7, 60.9, 49.1, 36.2, 33.6, 31.1, 24.7 ppm. Complex: <sup>1</sup>H NMR (CDCl<sub>3</sub>, 400 MHz): δ = 3.75-3.95 (m, 4H), 3.52 (m, 16H), 3.14 (m, 24H), 2.07-2.10 (m, 4H), 1.65-1.81 (m, 4H), 1.39-1.41 (m, 4H), 1.25-1.37 (m, 4H) ppm. <sup>13</sup>C NMR (CDCl<sub>3</sub>, 101 MHz): δ = 158.0, 68.1, 47.9/49.4, 34.7/35.0, 31.6, 23.0 ppm.

#### **General procedure for polymerization of lactide (*rac*-LA and *L*-LA)**

Taking a typical polymerization of CHO/[*rac*-LA]/[Zn] = 1000/5000/1 as an example: The polymerization is carried out in a 20.0 mL pre-dried tube. Appropriate amounts of zinc complex (5 μmol), CHO (5 mmol) and *rac*-LA (25 mmol) were added in the glove box; the mixture was then placed in an oil bath with a pre-set temperature and reacted for a predetermined time. After cooling to room temperature with water and taking out a small amount of the reaction mixture for <sup>1</sup>H NMR analysis, the remaining mixture was dissolved with a small amount of dichloromethane and precipitated with a large amount of ethanol. The resulting polymer was collected, washed several times with ethanol and dried overnight under vacuum at 45 °C.

## 2. Supplementary Figures and Tables

### 2.1 Characterization of Zinc Complex

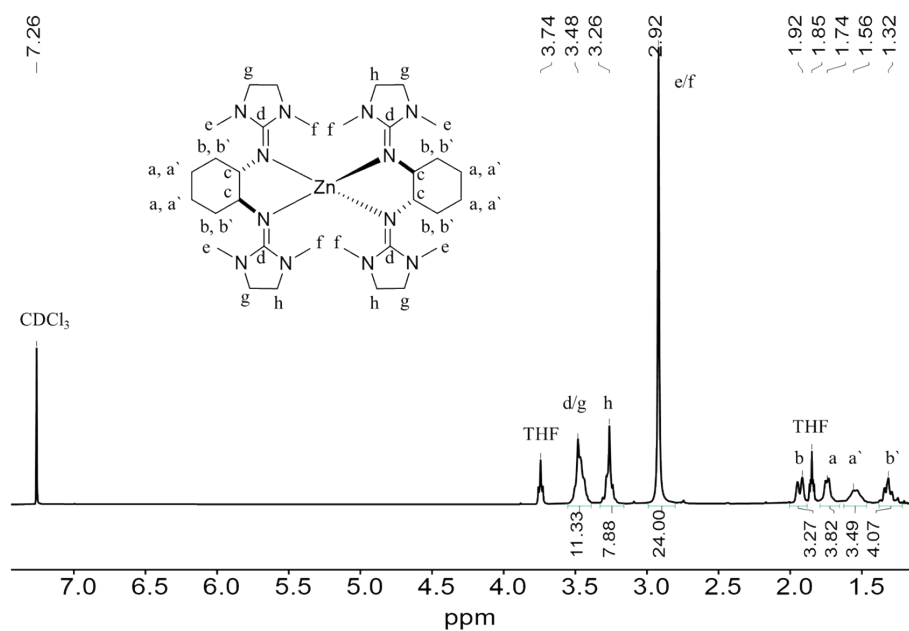

**Figure S1.** <sup>1</sup>H-NMR spectrum of the zinc complex (CDCl<sub>3</sub>, 400 MHz).

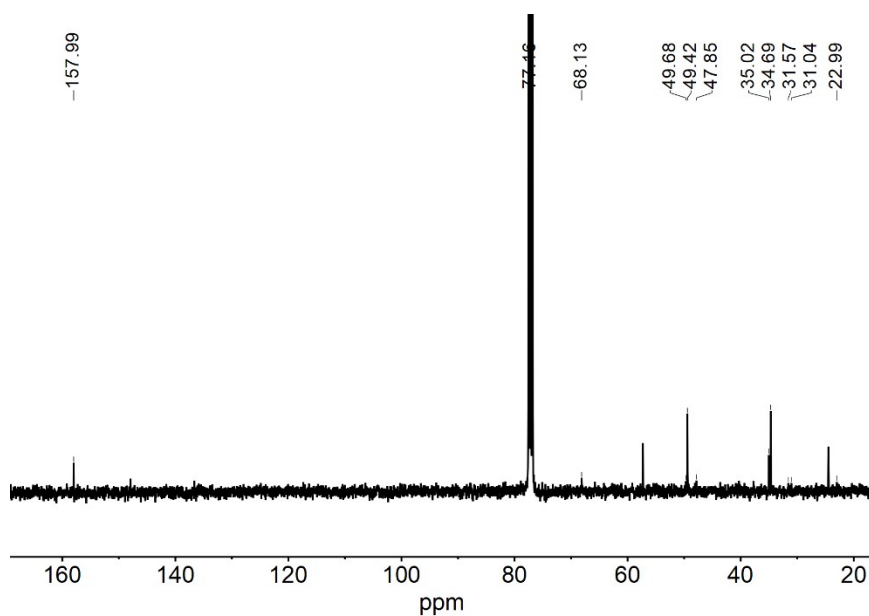

**Figure S2.** <sup>13</sup>C-NMR spectrum of the zinc complex (CDCl<sub>3</sub>, 101 MHz).

## 2.2 NMR Characterization

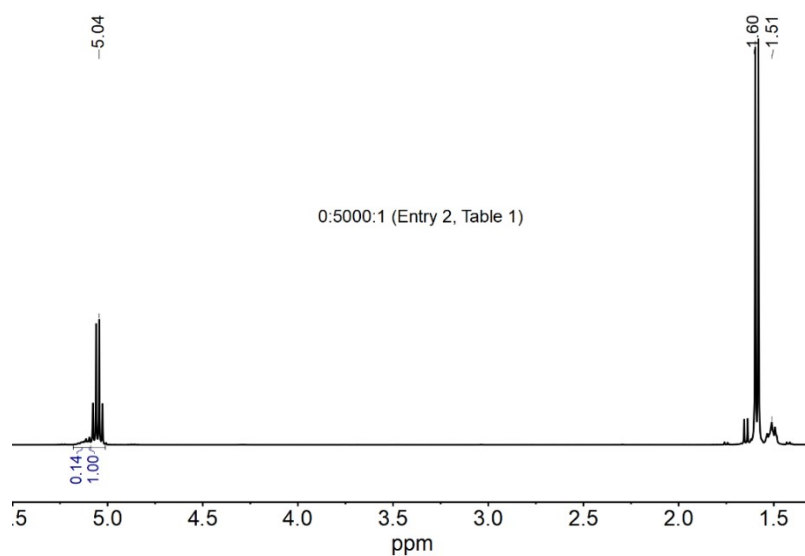

**Figure S3.** Example of <sup>1</sup>H NMR spectrum of *rac*-LA polymerization. CHO/[*rac*-LA]/[Zn] = 0:5000:1, conversion=14% (Entry 2, Table 1).

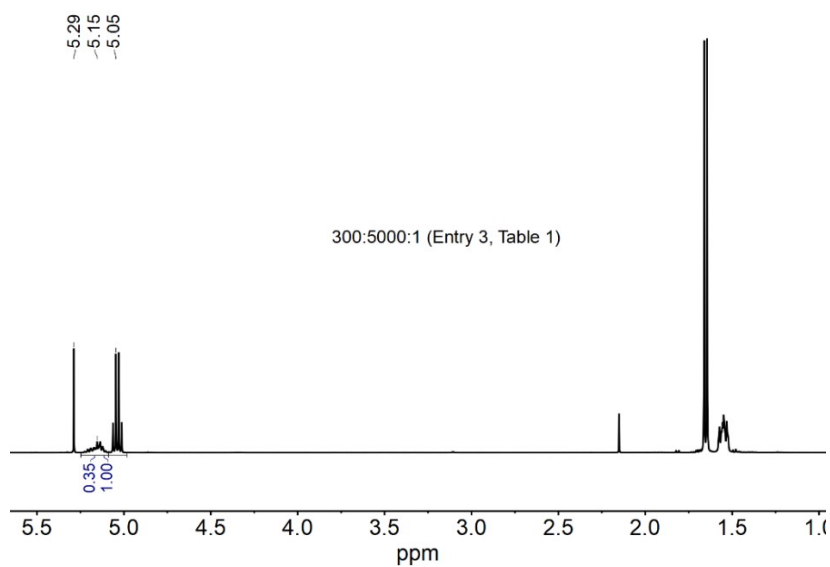

**Figure S4.** Example of <sup>1</sup>H NMR spectrum of *rac*-LA polymerization. CHO/[*rac*-LA]/[Zn] = 300:5000:1, conversion=35% (Entry 3, Table 1).

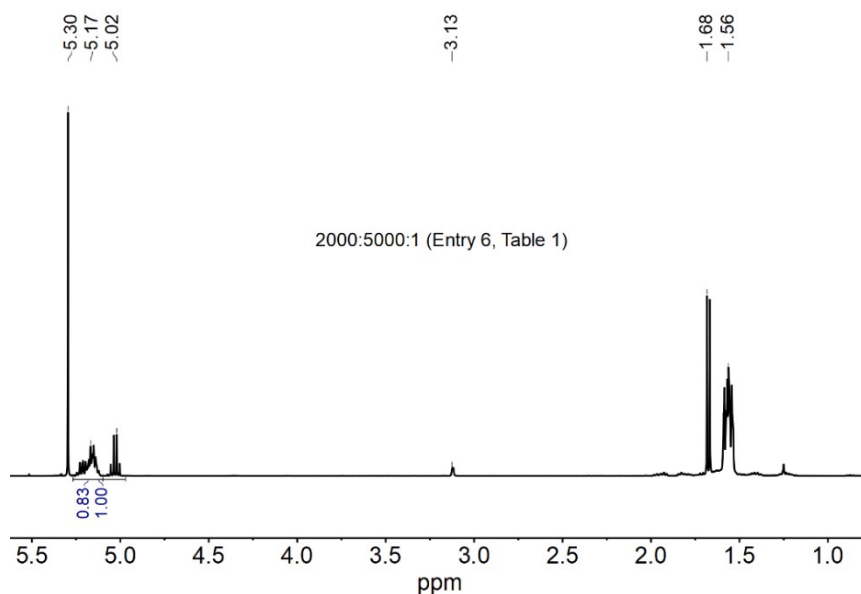

**Figure S5.** Example of  $^1\text{H}$  NMR spectrum of *rac*-LA polymerization.  $\text{CHO}/[\textit{rac}\text{-LA}]/[\text{Zn}] = 2000:5000:1$ , conversion=83% (Entry 6, Table 1).

The parameter  $P_m$  is the tetrad probability to give *meso* enchainment between monomer units and is determined from the methine region of the homonuclear decoupled  $^1\text{H}$  NMR spectrum:  $[\text{mmm}] = P_m^2 + (1 - P_m)P_m/2$ ,  $[\text{mmr}] = [\text{rmm}] = (1 - P_m)P_m/2$ ,  $[\text{rmr}] = (1 - P_m)^2/2$ , and  $[\text{mrm}] = [(1 - P_m)^2 + P_m(1 - P_m)]/2$ .

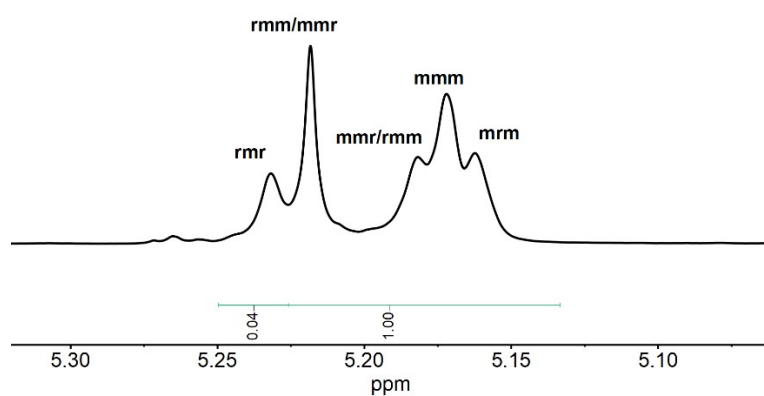

**Figure S6.** Homonuclear decoupled  $^1\text{H}$  NMR spectrum of the methine part of poly(*rac*-LA),  $P_m = 0.72$ . (Entry 2, Table 1).

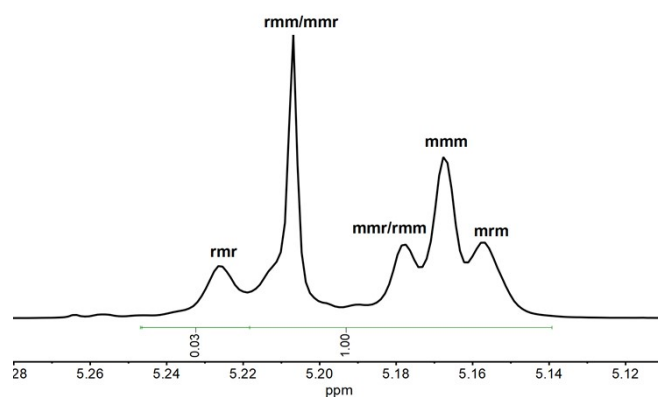

**Figure S7.** Homuncular decoupled  $^1\text{H}$  NMR spectrum of the methine part of poly(*rac*-LA),  $P_m = 0.76$ . (Entry 3, Table 1).

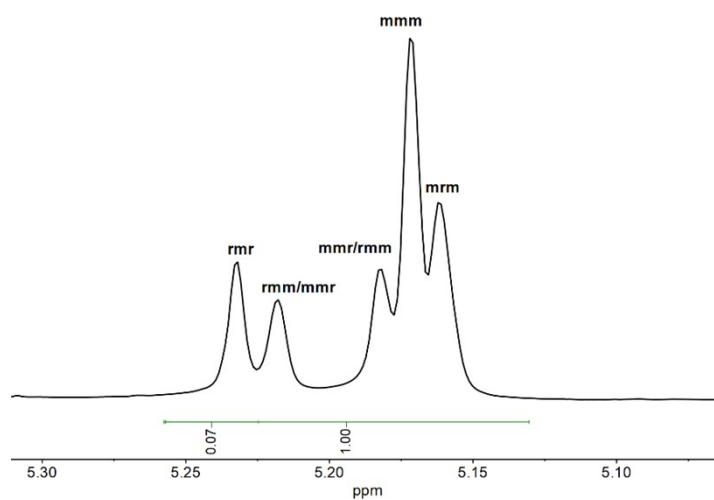

**Figure S8.** Homuncular decoupled  $^1\text{H}$  NMR spectrum of the methine part of poly(*rac*-LA),  $P_m = 0.63$ . (Entry 6, Table 1).

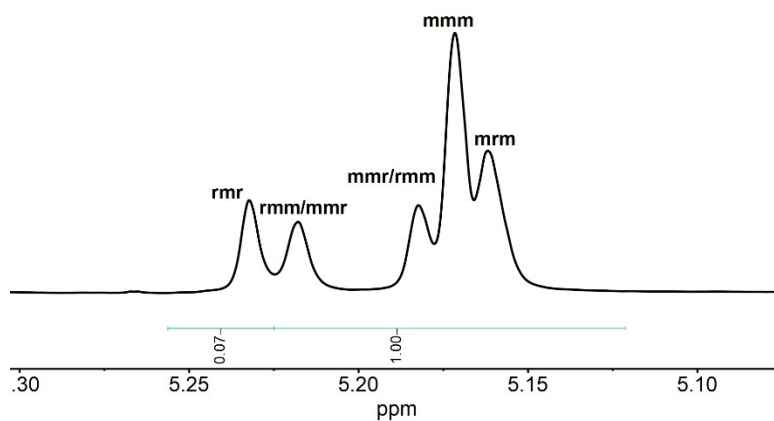

**Figure S9.** Homuncular decoupled  $^1\text{H}$  NMR spectrum of the methine part of poly(*rac*-LA),  $P_m = 0.63$ . (Entry 3, Table 2).



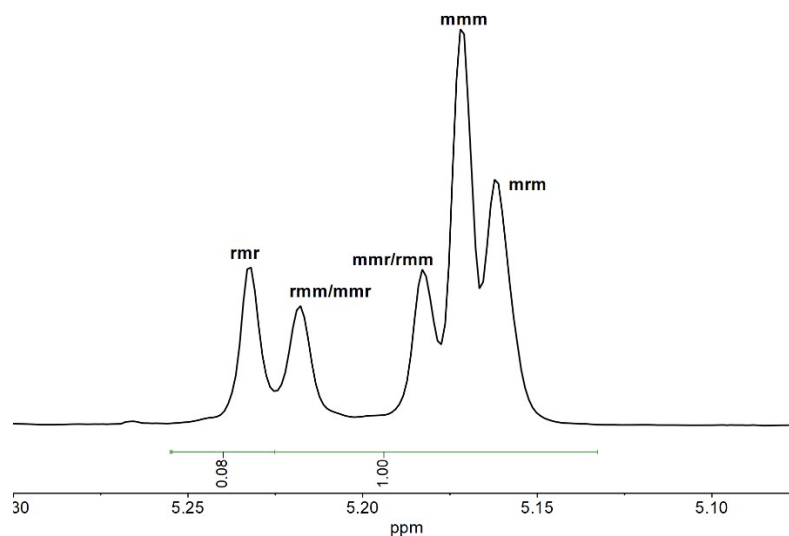

**Figure S10.** Homuncular decoupled  $^1\text{H}$  NMR spectrum of the methine part of poly(*rac*-LA),  $P_m = 0.60$ . (Entry 4, Table 2).

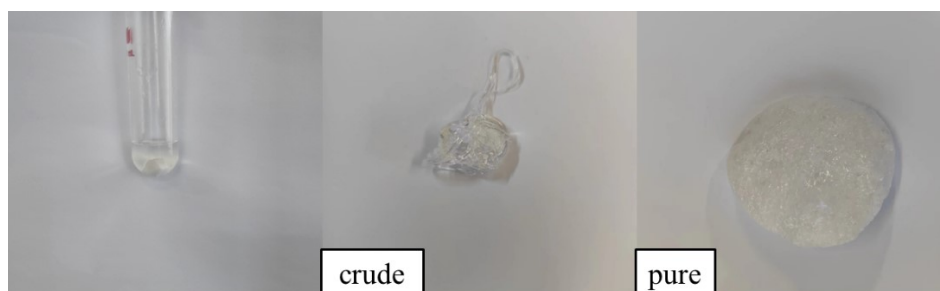

**Figure S11.** The images show, from left to right, the crude product when the reaction was stopped, the untreated product, and the purified product.

### 2.3 Polymerization Results

**Table S1.** ROP of *rac*-LA initiated by the complex/epoxide catalytic system<sup>a</sup>

| Entry          | Co-initiator | Cat.                 | Co-initiator:LA:cat. | t/min | Conv. <sup>b</sup> /<br>% | $M_n^c$ | $D^c$ |
|----------------|--------------|----------------------|----------------------|-------|---------------------------|---------|-------|
| 1              | PO           | Zn                   | 1000:5000:1          | 20    | 85                        | 111.4   | 1.33  |
| 2              | BO           | Zn                   | 1000:5000:1          | 20    | 54                        | 60.6    | 1.41  |
| 3              | ECH          | Zn                   | 1000:5000:1          | 20    | 92                        | 28.8    | 1.43  |
| 4              | GMA          | Zn                   | 1000:5000:1          | 20    | 94                        | 16.0    | 1.32  |
| 5 <sup>d</sup> | -            | Zn                   | 0:5000:1             | 20    | 0                         | -       | -     |
| 6 <sup>e</sup> | -            | Sn(Oct) <sub>2</sub> | 0:5000:1             | 20    | 27                        | 52.7    | 1.29  |

<sup>a</sup> Conditions: 150 °C, 5  $\mu\text{mol}$  [Zn]. <sup>b</sup> According to  $^1\text{H}$  NMR. <sup>c</sup>  $\text{kg}\cdot\text{mol}^{-1}$ , determined by GPC in THF vs. polystyrene standards using a correcting factor of 0.58.<sup>3</sup> <sup>d</sup> Using BnOH as the co-catalyst, the reaction was carried out according to monomer: catalyst: BnOH = 5000:1:2. <sup>e</sup> Using Sn(Oct)<sub>2</sub> as catalyst.

## 2.4 GPC Traces for Polymer Degradation

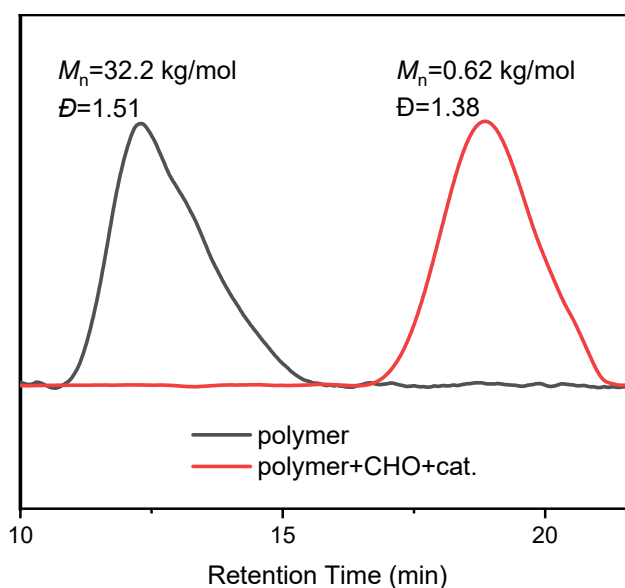

**Figure S12.** GPC traces: Obtained poly(*rac*-LA) (entry 2, Table 2) vs. the product of the polymer after 1 h reaction in the presence of CHO and catalyst (conditions: Polymer/[cat.] = 100/1, 0.2 mL CHO, 180 °C)

## 2.5 Thermal Analysis

**Table S2.** Thermal analysis of selected PLAs<sup>a</sup>

|                | CHO:LA:cat.               | t/min | $M_n$ /(kg/mol) <sup>b</sup> | $P_m$ <sup>c</sup> | $T_g$ /°C | $T_m$ /°C | $\Delta H_m$ /J/g | $X_c$ /% |
|----------------|---------------------------|-------|------------------------------|--------------------|-----------|-----------|-------------------|----------|
| <i>rac</i> -LA | 2000:5000:1               | 20    | 60.8                         | 0.63               | 50.8      | -         | -                 | -        |
|                | 1000:10000:1              | 20    | 50.1                         | ND <sup>d</sup>    | 45.8      | -         | -                 | -        |
|                | 5000:50000:1              | 60    | 36.7                         | 0.63               | 50.4      | -         | -                 | -        |
|                | 5000:50000:1 <sup>e</sup> | 60    | 6.3                          | 0.60               | 49.4      | -         | -                 | -        |
| <i>L</i> -LA   | 1000:5000:1-20 min        | 20    | 22.1 <sup>f</sup>            | ND                 | 60.2      | 176.8     | 52.7              | 87.0     |
|                | 1000:5000:1-7.5 min       | 7.5   | 23.7 <sup>f</sup>            | ND                 | 60.7      | 175.6     | 40.8              | 75.9     |

<sup>a</sup> DSC experimental conditions are reported in Supporting Information. <sup>b</sup> Experimental  $M_n$  values determined by GPC in THF vs. polystyrene standards using a correcting factor of 0.58.<sup>3</sup> <sup>c</sup>  $P_m$  is the probability of forming a new *m*-triad. <sup>d</sup> Not determined. <sup>e</sup> 180 °C. <sup>f</sup>  $M_n$  values of PLLA was determined by GPC in CHCl<sub>3</sub> vs. polystyrene standards with a correcting factor of 0.58.<sup>3</sup>

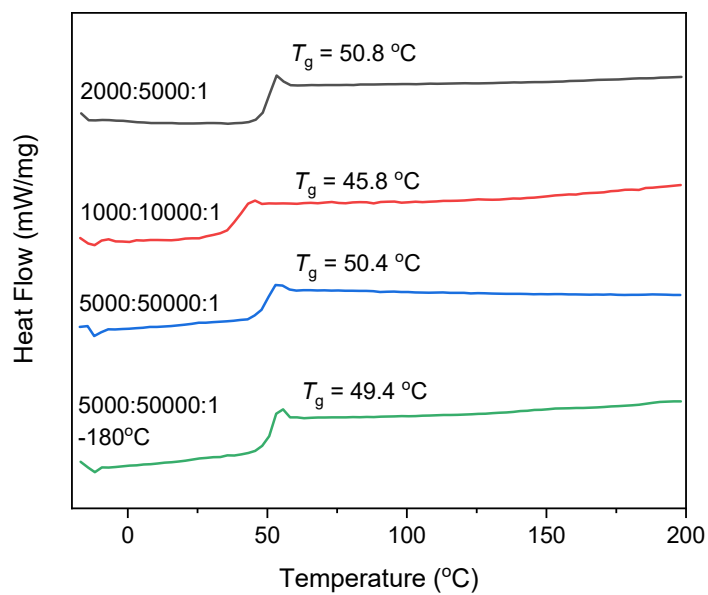

**Figure S13.** Typical second heating DSC runs of poly(*rac*-LA) obtained at different molar ratios and temperatures (entries 6, 10 and 11, Table 1; entry 4, Table 2).

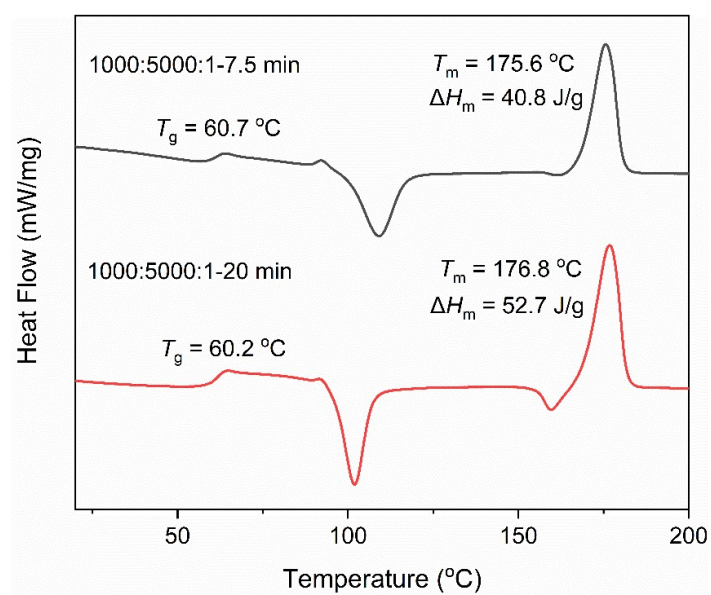

**Figure S14.** Typical second heating DSC runs of poly(*L*-LA). Samples are from Table S2.

## 2.6 Kinetic Study

**Table S3.** Kinetic study of ROP of *rac*-LA and *L*-LA catalyzed by CHO/[Zn] system.<sup>a</sup>

| monomer        | t/min | Temp./°C | Conv. <sup>b</sup> /% | $M_n$ /(kg/mol) <sup>c</sup> | $\bar{D}$ <sup>c</sup> |
|----------------|-------|----------|-----------------------|------------------------------|------------------------|
| <i>L</i> -LA   | 6     | 150      | 16                    | -                            | -                      |
|                | 7     | 150      | 73                    | 27.2                         | 1.37                   |
|                | 7.5   | 150      | 77                    | 23.7                         | 1.51                   |
|                | 8     | 150      | 86                    | 32.5                         | 1.57                   |
| <i>rac</i> -LA | 10    | 150      | 61                    | 20.5                         | 1.59                   |
|                | 12    | 150      | 66                    | 25.3                         | 1.34                   |
|                | 16    | 150      | 83                    | 27.1                         | 1.40                   |
|                | 18    | 150      | 86                    | 30.2                         | 1.53                   |
|                | 3     | 180      | 61                    | 28.1                         | 1.37                   |
|                | 4     | 180      | 67                    | 33.9                         | 1.38                   |
|                | 4.5   | 180      | 69                    | 46.6                         | 1.42                   |
|                | 7.5   | 180      | 82                    | 32.5                         | 1.37                   |

<sup>a</sup> Condition: CHO/[LA]/[Zn] = 1000/5000/1. <sup>b</sup> According to <sup>1</sup>H NMR. <sup>c</sup> Experimental  $M_n$  values determined by GPC in THF vs. polystyrene standards using a correcting factor of 0.58.<sup>3</sup>

## 2.7 MALDI-TOF-MS Spectra

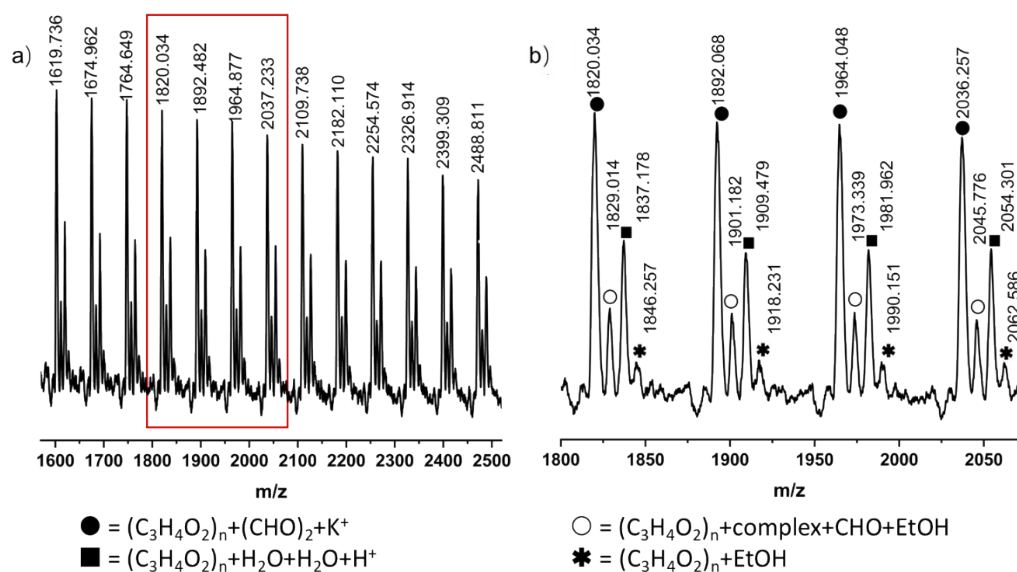

**Figure S15.** MALDI-TOF-MS spectrum of PLA as obtained in entry 4, Table 2. a) Region from 1600 to 2500 m/z. b) Enlargement of Figure S14, region from 1800 to 2070 m/z; with symbols ○, ●, ○, and ← indicate the species on the bottom.

The observation of ethanol as end group can be traced back to its use for polymer precipitation; the presence of water as end group originates from the impurity of LA.<sup>2,4,5</sup> The presence of EtOH in Figure 3a may be due to its role as a precipitant and its coordination with the complex during the precipitation process.

## 2.8 The Role of CHO

To investigate the role of CHO, the following experiments were conducted: The polymerization was carried out in a 20.0 mL pre-dried tube. CHO (100 or 1000 equivalents) was pre-stirred with the catalyst at 150 °C for 5 min, then 5000 equivalents of LA monomer was added and the reaction was stopped by water cooling after 20 min. A minute quantity was extracted for the purpose of <sup>1</sup>H NMR examination. The collected data and <sup>1</sup>H NMR spectra are presented in Table S4 and Figure S16.

**Table S4.** Polymerization after stepwise addition of CHO, catalyst and monomer.<sup>a</sup>

| Entry          | CHO:cat.:LA | t/min | Conv. <sup>b/</sup><br>% |
|----------------|-------------|-------|--------------------------|
| 1              | 100:1+5000  | 5+20  | 46                       |
| 2              | 1000:1+5000 | 5+20  | 84                       |
| 3 <sup>c</sup> | 300:1:5000  | 20    | 35                       |
| 4 <sup>c</sup> | 1000:1:5000 | 20    | 88                       |

<sup>a</sup> Conditions: 5 μmol [Zn], 150 °C. <sup>b</sup> According to <sup>1</sup>H NMR. <sup>c</sup> CHO, catalyst and monomer were added together for the reaction, data from entries 3 and 5 in Table 1 in the main text.

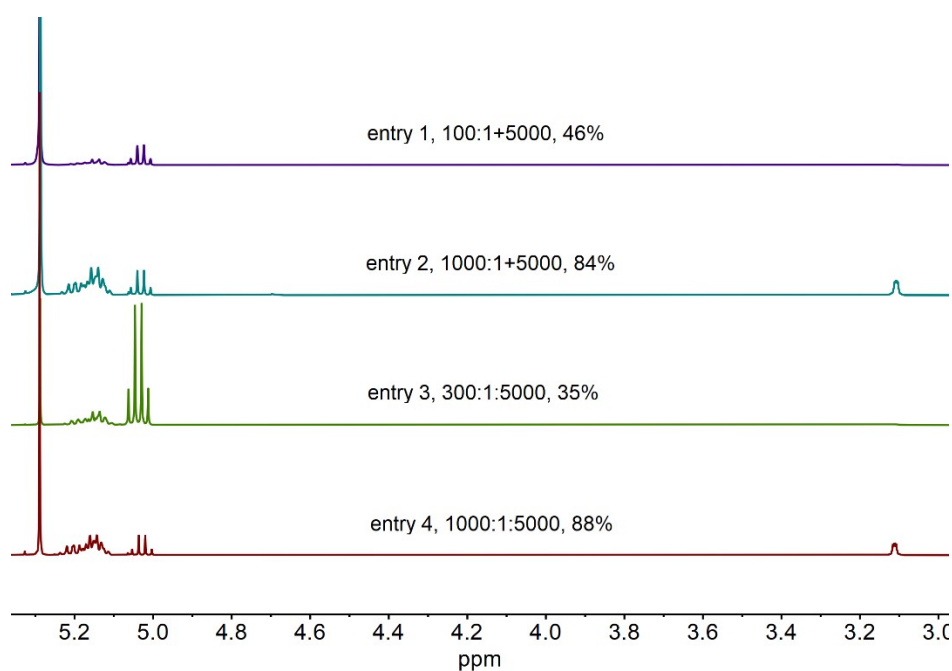

**Figure S16.** <sup>1</sup>H NMR spectra of *rac*-LA polymerization, including stepwise and one-step reactions (entries 1-4, Table S4).

## 2.9 ICP-OES Data

**Table S5.** Zn residue content<sup>a</sup>

| PLA sample                             | Zn content            |
|----------------------------------------|-----------------------|
| Unpurified polymer (entry 11, Table 1) | 15.5 mg/kg (15.5 ppm) |
| Precipitated polymer                   | 6.7 mg/kg (6.7 ppm)   |

<sup>a</sup> Zn content as derived from inductively coupled plasma-optical emission spectrometry in 25 mL sample solution, calculated Zn content in original polymer samples, and their weight content.

## 3. References

- (1) Fischer, E. W.; Sterzel, H. J.; Wegner, G. Investigation of the structure of solution grown crystals of lactide copolymers by means of chemical reactions. *Kolloid Z. Z. Polym.* **1973**, *251*, 980-990.
- (2) Hermann, A.; Hill, S.; Metz, A.; Heck, J.; Hoffmann, A.; Hartmann, L.; Herres-Pawlis, S. Next generation of zinc bisguanidine polymerization catalysts towards highly crystalline, biodegradable polyesters. *Angew. Chem. Int. Ed.* **2020**, *59*, 21778-21784.
- (3) Save, M.; Schappacher, M.; Soum, A., Controlled ring-opening polymerization of lactones and lactides initiated by lanthanum isopropoxide, 1 General aspects and kinetics. *Macromol. Chem. Phys.* **2002**, *203*, 889-899.
- (4) Hermann, A.; Becker, T.; Schafer, M. A.; Hoffmann, A.; Herres-Pawlis, S., Effective ligand design: Zinc complexes with guanidine hydroquinoline ligands for fast lactide polymerization and chemical recycling. *ChemSusChem* **2022**, e202201075.
- (5) Impemba, S.; Della Monica, F.; Grassi, A.; Capacchione, C.; Milione, S., Cyclic polyester formation with an [OSSO]-type iron(III) catalyst. *ChemSusChem* **2020**, *13*, 141-145.
